# Supplementary material for: AR-C155858 is a potent inhibitor of monocarboxylate transporters MCT1 and MCT2 that binds to an intracellular site involving transmembrane helices 7–10
Source: PubMed Central journal article supplement — Biochem J. 2010 Jan 15;425(Pt 3):523–30. doi: 10.1042/BJ20091515 (PMC2811425; doi:10.1042/bj20091515), 2010-01-15
Supplement: bj4250523add.pdf [file bj4250523add.pdf]

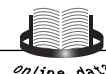

SUPPLEMENTARY ONLINE DATA

# AR-C155858 is a potent inhibitor of monocarboxylate transporters MCT1 and MCT2 that binds to an intracellular site involving transmembrane helices 7–10

Matthew J. OVENS\*, Andrew J. DAVIES\*, Marieangela C. WILSON\*, Clare M. MURRAY† and Andrew P. HALESTRAP\*<sup>1</sup>

\*Department of Biochemistry, School of Medical Sciences, University of Bristol, University Walk, Bristol BS8 1TD, U.K., and †Bioscience Department, AstraZeneca R&D Charnwood, Bakewell Road, Loughborough, Leicestershire LE11 5RH, U.K.

**Table S1 Primers used in PCR generation of chimaeric MCTs**

| MCT form   | MCT fragment                  | Left-hand primer                                      | Right-hand primer                                         |
|------------|-------------------------------|-------------------------------------------------------|-----------------------------------------------------------|
| MCT1/4     | MCT1 (TM1–6)                  | TCTTGGAAATTCATCGACACCT                                | GGACAAGTCCAGGAATTTATTAAC                                  |
|            | MCT4 (TM7–12)                 | CTGGACTTGTCCGTCTCCGAGAC                               | GGACCTCTCCCTGCTCCCTGC                                     |
| MCT4/1     | MCT4 (TM1–6)                  | CCAAGGTGAAACAGCCCTCCTGG                               | GGACAAGTCCAGCAGGCGCGG                                     |
|            | MCT1 (TM7–12)                 | CTGGACTTGTCCCTGTTTAC                                  | ACACAAATGTCCACTGTCT                                       |
| MCT1/4TM11 | MCT1 (N-terminus to TM10)     | TCTTGGAAATTCATCGACACCT                                | CCCACAGCACTGGAGAAC                                        |
|            | MCT4 (TM11/12 and C-terminus) | CCCAGAGGTTCTCCAGTGC                                   | GGACCTCTCCCTGCTCCCTGC                                     |
| MCT4/1TM11 | MCT4 (N-terminus to TM10)     | CCAAGGTGAAACAGCCCTCCTGG                               | CCCACAGCACTGGAGAAC                                        |
|            | MCT1 (TM11/12 and C-terminus) | CCCAGAGGTTCTCCAGTGC                                   | ACACAAATGTCCACTGTCT                                       |
| MCT1trnc   | MCT1 (N-terminus to TM12 end) | TCTTGGAAATTCATCGACACCT                                | AAGTCGATAATTGATGCC                                        |
| MCT1/4c    | MCT1 (TMs)                    | TCTTGGAAATTCATCGACACCT                                | GCAGCACAAGGGAAGAGGTAGAGCCT                                |
|            | MCT4 (C-terminus)             | AGGCCTCTACCTCTCCCTTGCTGCTGC                           | GGACCTCTCCCTGCTCCCTGC                                     |
|            | Site-directed mutagenesis     | GGCCTCTACCTCTCCCTTGCTGCTGCTGC (sense strand primer)   | CAGCAGCAGCACAAGGAAGAGGTAGAGGCC (antisense strand primer)  |
| MCT4/1c    | MCT4 (TMs)                    | CCAAGGTGAAACAGCCCTCCTGG                               | CCCATAACAATGAGGAGGTGAGCACCT                               |
|            | MCT1 (C-terminus)             | AGGTGCTCACCTCCTCATTGGTATGGG                           | ACACAAATGTCCACTGTCT                                       |
|            | Site-directed mutagenesis     | CCTCCTCATTGGTATTGGGCATCAATTATCG (sense strand primer) | CGATAATTGATGCCCAATACCAATGAGGAGG (antisense strand primer) |

**Table S2 crRNA injection quantities and [<sup>14</sup>C]-substrate uptake times used for *Xenopus* oocyte transport studies**

N/A, not applicable.

| MCT form | AR-C155858 studies  |                                                          | Kinetic studies                                                          |                                                                                                 |
|----------|---------------------|----------------------------------------------------------|--------------------------------------------------------------------------|-------------------------------------------------------------------------------------------------|
|          | crRNA injected (ng) | [ <sup>14</sup> C]-substrate uptake time for assay (min) | crRNA injected (ng)                                                      | [ <sup>14</sup> C]-substrate uptake time for assay (min)                                        |
| MCT1     | 20                  | 2.5                                                      | 5 (for L-lactate)<br>2 (for pyruvate)                                    | 5<br>5                                                                                          |
| MCT4     | 20                  | 2.5                                                      | 5 (for L-lactate)<br>20 (for pyruvate)                                   | 5<br>10 (for 0.2, 0.5, 1, 2 and 5 mM)<br>2.5 (for 20, 50 and 75mM)                              |
| MCT1/4   | 20                  | 20                                                       | 20 (for L-lactate)<br><br>10 (for pyruvate)<br>10 (for 20, 50 and 75 mM) | 20 (for 0.2, 0.5, 1, 2 and 5 mM)<br>5 (for 20, 50 and 75 mM)<br>5 (for 0.2, 0.5, 1, 2 and 5 mM) |
| MCT4/1   | 20                  | 20                                                       | N/A                                                                      | N/A                                                                                             |

Received 30 September 2009/3 November 2009; accepted 20 November 2009  
Published as BJ Immediate Publication 20 November 2009, doi:10.1042/BJ20091515

<sup>1</sup> To whom correspondence should be addressed (email a.halestrap@bristol.ac.uk).
